# Supplementary material for: Paeoniflorin Suppressed High Glucose-Induced Retinal Microglia MMP-9 Expression and Inflammatory Response via Inhibition of TLR4/NF-κB Pathway Through Upregulation of SOCS3 in Diabetic Retinopathy
Source: Springer Nature journal article supplement (doi:10.1007/s10753-017-0571-z), 2017-06-21
Supplement: MOESM1 [file 12461326]

**Paeoniflorin suppressed high glucose induced retinal microglia MMP-9 expression and** **inflammatory response via inhibition of TLR-4/NF-KB pathway through upregulation of SOCS-3 in diabetic retinopathy**

**Su-Hua Zhu1**†**, Bing-Qian Liu2**†**, Mao-Juan Hao1**† **,Yi-Xin Fan3, Cheng** **Qian1, Peng** **Teng1, Xiao-Wei Zhou1, Liang Hu1,Wen-Tao Liu1, Zhi-Lan Yuan2*, Qing-Ping Li1***

1 Jiangsu Provincial Key Lab of Cardiovascular Diseases and Molecular Intervention, Department of Pharmacology, Nanjing Medical University, Nanjing, 210029, People’s Republic of China.

2 Department of Ophthalmology, The First Affiliated Hospital of Nanjing Medical University, 300 Guangzhou Road, Nanjing, Jiangsu 210029, People’s Republic of China.

3  Department of Pharmacology, China Pharmaceutical University, Nanjing, Jiangsu, 211198, People’s Republic of China.

1107940865@qq.com(S.Z.);13151370243@qq.com(Q.L.);1164562748@qq.com(M.H.);1026912119@qq.com(Y.F.);461188761@qq.com(C.Q.);1468783276@qq.com(P.T.);544588459@qq.com(X.Z.);lianghu@njmu.edu.cn(L.H.); [painresearch@njmu.edu.cn(W.L.)](mailto:painresearch@njmu.edu.cn(W.L.))

† These authors contributed equally to this work.

***** Correspondence: pharm_qpli@njmu.edu.cn; zhilanyuan@vip.sina.com

**Supplementary Data**

**
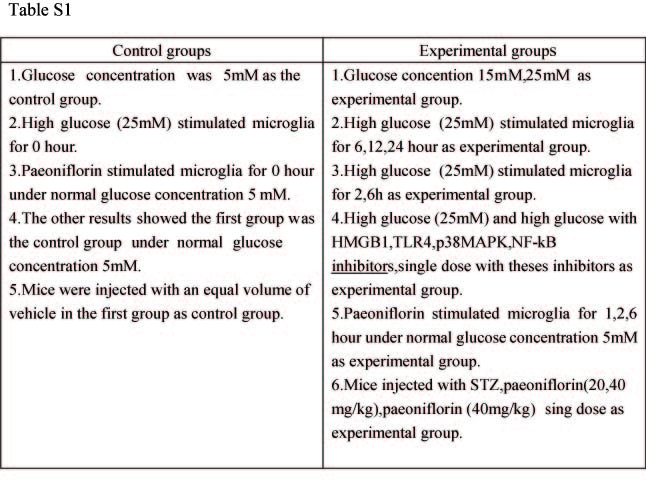
**

Table S1. Control groups and experimental groups
